# Supplementary material
Source: publisher site journal article supplement (https://www.dovepress.com/article/371053)
Supplement: Supplementary file 1 [file get_supplementary_file.php]

## Supplementary Materials

### Prevalence and determinants of mental health problems and mental health stigma among medical students of different nationalities in Qatar #371053

**Table S1 Mental health screening tools standardized cut-off values**

| <b>Tool</b>      | None | Mild | Moderate | Moderately severe | Severe |
|------------------|------|------|----------|-------------------|--------|
| <b>PHQ-9</b>     | 0–4  | 5–9  | 10–14    | 15–19             | 20–27  |
| <b>GAD-7</b>     | 0–5  | 6–10 | 11–15    | -                 | 16–21  |
| <b>Kessler 6</b> | 0    | 1–5  | 6–10     | -                 | 11–24  |

**Table S2 Binary risk groups cut-off values**

| <b>Tool</b>      | Low Risk | High Risk |
|------------------|----------|-----------|
| <b>PHQ-9</b>     | ≤14      | >14       |
| <b>GAD-7</b>     | ≤15      | >15       |
| <b>Kessler 6</b> | ≤12      | >12       |
